# Supplementary material for: A new theory of tree sap flow
Source: PeerJ. 2025 Jul 31;13:e19670. doi: 10.7717/peerj.19670 (PMC12318510; doi:10.7717/peerj.19670)
Supplement: Supplemental Information 2 — Measurement data of the potential difference in the cross-sectional plane of stemless oak between the outer dry and inner wet areas [file peerj-13-19670-s002.xlsx]

## Sheet: Munka1
Measurement of the potential difference in the cross-sectional plane of stemless oak between the outer dry and inner wet areas
Measurement of the potential difference in the cross-sectional plane of stemless oak between the outer dry and inner wet areas	DU, mV
1	69
2	72
3	112
4	75
5	59
6	67
7	68
8	84
9	49
10	54
11	92
12	73
Average	72.8333
St. Dev.	16.3749
